# Supplementary material
Source: HighWire-hosted journal article supplement (https://bmjopen.bmj.com/content/10/9/e039221)
Supplement: inline-supplementary-material-1 [file inline-supplementary-material-1.pdf]

## Supplementary material

Appendix 1: All-cause deaths in Indonesia 2017.<sup>1 2</sup>

| Age group (years) | Men    | Women  |
|-------------------|--------|--------|
| 15-19             | 1,580  | 956    |
| 20-24             | 3,574  | 1,758  |
| 25-29             | 6,071  | 3,222  |
| 30-34             | 9,237  | 5,114  |
| 35-39             | 13,431 | 8,806  |
| 40-44             | 20,628 | 14,069 |
| 45-49             | 30,875 | 21,140 |
| 50-54             | 44,519 | 28,968 |
| 55-59             | 60,427 | 35,378 |
| 60-64             | 72,309 | 39,985 |
| 65-69             | 73,400 | 44,741 |
| 70-74             | 69,199 | 50,788 |

Appendix 2: Age- and sex-specific all-cause mortality rates in the Indonesian working-age population.<sup>1 2</sup>

| Age | Men      | Women    |
|-----|----------|----------|
| 15  | 0.000093 | 0.000040 |
| 16  | 0.000102 | 0.000044 |
| 17  | 0.000113 | 0.000049 |
| 18  | 0.000126 | 0.000055 |
| 19  | 0.000139 | 0.000061 |
| 20  | 0.000154 | 0.000068 |
| 21  | 0.000171 | 0.000075 |
| 22  | 0.000189 | 0.000084 |
| 23  | 0.000209 | 0.000093 |

---

|           |          |          |
|-----------|----------|----------|
| <b>24</b> | 0.000232 | 0.000104 |
| <b>25</b> | 0.000257 | 0.000116 |
| <b>26</b> | 0.000284 | 0.000129 |
| <b>27</b> | 0.000315 | 0.000143 |
| <b>28</b> | 0.000349 | 0.000159 |
| <b>29</b> | 0.000386 | 0.000177 |
| <b>30</b> | 0.000428 | 0.000197 |
| <b>31</b> | 0.000474 | 0.000219 |
| <b>32</b> | 0.000525 | 0.000244 |
| <b>33</b> | 0.000581 | 0.000271 |
| <b>34</b> | 0.000644 | 0.000302 |
| <b>35</b> | 0.000713 | 0.000336 |
| <b>36</b> | 0.000789 | 0.000374 |
| <b>37</b> | 0.000874 | 0.000416 |
| <b>38</b> | 0.000968 | 0.000463 |
| <b>39</b> | 0.001072 | 0.000515 |
| <b>40</b> | 0.001188 | 0.000573 |
| <b>41</b> | 0.001315 | 0.000638 |
| <b>42</b> | 0.001457 | 0.000710 |
| <b>43</b> | 0.001613 | 0.000790 |
| <b>44</b> | 0.001787 | 0.000879 |
| <b>45</b> | 0.001979 | 0.000978 |
| <b>46</b> | 0.002191 | 0.001088 |
| <b>47</b> | 0.002427 | 0.001211 |
| <b>48</b> | 0.002688 | 0.001347 |
| <b>49</b> | 0.002977 | 0.001499 |
| <b>50</b> | 0.003297 | 0.001668 |
| <b>51</b> | 0.003651 | 0.001856 |
| <b>52</b> | 0.004044 | 0.002065 |
| <b>53</b> | 0.004478 | 0.002298 |
| <b>54</b> | 0.004960 | 0.002557 |
| <b>55</b> | 0.005493 | 0.002845 |

---

## Appendix 3: Trends of mortality rates in Indonesian men and women

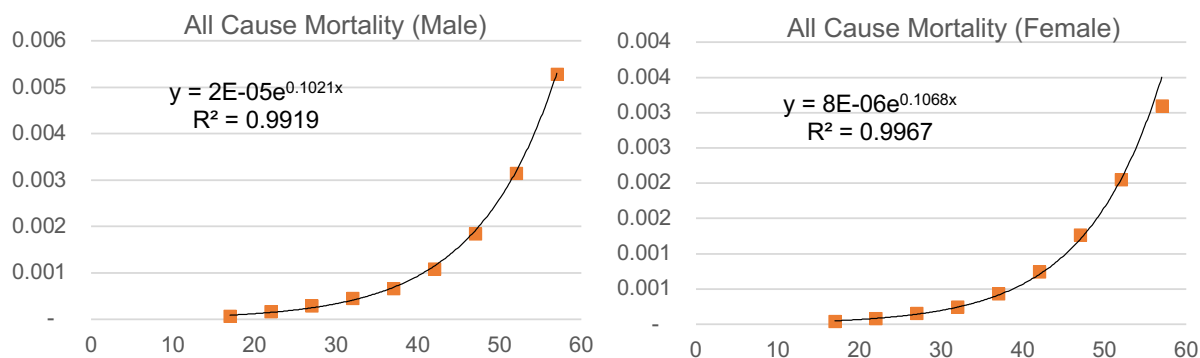Appendix 4: Age- and sex-specific prevalence of coronary heart disease in Indonesian working-age population. <sup>3</sup>

| Age | Men   | Women |
|-----|-------|-------|
| 15  | 0.43% | 0.54% |
| 16  | 0.44% | 0.56% |
| 17  | 0.45% | 0.57% |
| 18  | 0.47% | 0.59% |
| 19  | 0.49% | 0.62% |
| 20  | 0.51% | 0.64% |
| 21  | 0.53% | 0.67% |
| 22  | 0.55% | 0.70% |
| 23  | 0.58% | 0.74% |
| 24  | 0.61% | 0.78% |
| 25  | 0.64% | 0.82% |
| 26  | 0.67% | 0.86% |
| 27  | 0.71% | 0.90% |
| 28  | 0.74% | 0.95% |
| 29  | 0.78% | 1.00% |
| 30  | 0.83% | 1.06% |
| 31  | 0.87% | 1.12% |

|           |       |       |
|-----------|-------|-------|
| <b>32</b> | 0.92% | 1.18% |
| <b>33</b> | 0.96% | 1.24% |
| <b>34</b> | 1.01% | 1.30% |
| <b>35</b> | 1.07% | 1.37% |
| <b>36</b> | 1.12% | 1.44% |
| <b>37</b> | 1.18% | 1.52% |
| <b>38</b> | 1.24% | 1.59% |
| <b>39</b> | 1.30% | 1.67% |
| <b>40</b> | 1.36% | 1.75% |
| <b>41</b> | 1.43% | 1.84% |
| <b>42</b> | 1.50% | 1.93% |
| <b>43</b> | 1.57% | 2.02% |
| <b>44</b> | 1.64% | 2.11% |
| <b>45</b> | 1.71% | 2.21% |
| <b>46</b> | 1.79% | 2.31% |
| <b>47</b> | 1.87% | 2.41% |
| <b>48</b> | 1.95% | 2.51% |
| <b>49</b> | 2.04% | 2.62% |
| <b>50</b> | 2.12% | 2.73% |
| <b>51</b> | 2.21% | 2.84% |
| <b>52</b> | 2.30% | 2.96% |
| <b>53</b> | 2.39% | 3.08% |
| <b>54</b> | 2.49% | 3.20% |
| <b>55</b> | 2.58% | 3.32% |

## Appendix 5: Trends of prevalence of coronary heart disease in Indonesian men and women.

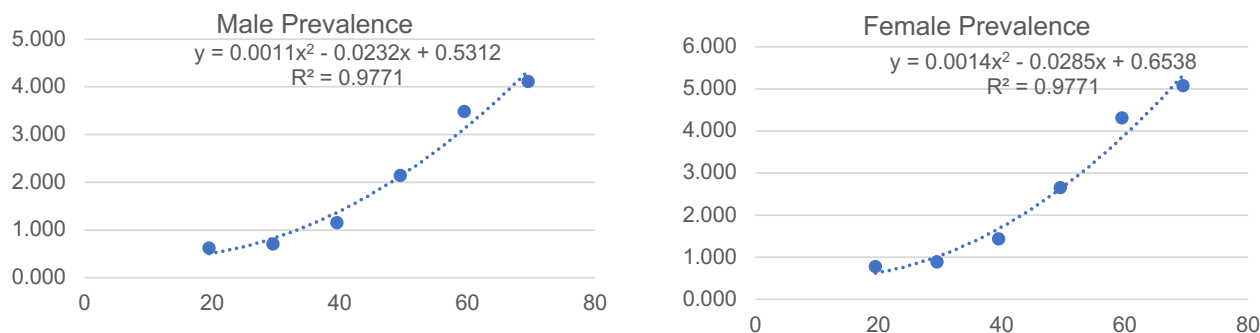

## Appendix 6: Age- and sex- specific mortality rates for the cohort with and without coronary heart disease of Indonesian working-age population.

| Age | Men                                  |                            | Women                                |                            |
|-----|--------------------------------------|----------------------------|--------------------------------------|----------------------------|
|     | Mortality rate with CHD <sup>4</sup> | Mortality rate without CHD | Mortality rate with CHD <sup>4</sup> | Mortality rate without CHD |
| 15  | 0.013%                               | 0.009%                     | 0.007%                               | 0.004%                     |
| 16  | 0.015%                               | 0.010%                     | 0.008%                               | 0.004%                     |
| 17  | 0.017%                               | 0.011%                     | 0.009%                               | 0.005%                     |
| 18  | 0.018%                               | 0.013%                     | 0.010%                               | 0.005%                     |
| 19  | 0.020%                               | 0.014%                     | 0.011%                               | 0.006%                     |
| 20  | 0.022%                               | 0.015%                     | 0.012%                               | 0.007%                     |
| 21  | 0.025%                               | 0.017%                     | 0.013%                               | 0.007%                     |
| 22  | 0.028%                               | 0.019%                     | 0.015%                               | 0.008%                     |
| 23  | 0.030%                               | 0.021%                     | 0.017%                               | 0.009%                     |
| 24  | 0.034%                               | 0.023%                     | 0.019%                               | 0.010%                     |
| 25  | 0.037%                               | 0.026%                     | 0.021%                               | 0.011%                     |
| 26  | 0.041%                               | 0.028%                     | 0.023%                               | 0.013%                     |
| 27  | 0.046%                               | 0.031%                     | 0.026%                               | 0.014%                     |
| 28  | 0.051%                               | 0.035%                     | 0.028%                               | 0.016%                     |
| 29  | 0.056%                               | 0.038%                     | 0.032%                               | 0.018%                     |

|           |        |        |        |        |
|-----------|--------|--------|--------|--------|
| <b>30</b> | 0.062% | 0.043% | 0.035% | 0.020% |
| <b>31</b> | 0.069% | 0.047% | 0.039% | 0.022% |
| <b>32</b> | 0.076% | 0.052% | 0.044% | 0.024% |
| <b>33</b> | 0.084% | 0.058% | 0.048% | 0.027% |
| <b>34</b> | 0.094% | 0.064% | 0.054% | 0.030% |
| <b>35</b> | 0.104% | 0.071% | 0.060% | 0.033% |
| <b>36</b> | 0.115% | 0.079% | 0.067% | 0.037% |
| <b>37</b> | 0.127% | 0.087% | 0.074% | 0.041% |
| <b>38</b> | 0.141% | 0.096% | 0.082% | 0.046% |
| <b>39</b> | 0.156% | 0.107% | 0.092% | 0.051% |
| <b>40</b> | 0.172% | 0.118% | 0.102% | 0.057% |
| <b>41</b> | 0.191% | 0.131% | 0.113% | 0.063% |
| <b>42</b> | 0.211% | 0.145% | 0.126% | 0.070% |
| <b>43</b> | 0.234% | 0.160% | 0.140% | 0.078% |
| <b>44</b> | 0.259% | 0.177% | 0.156% | 0.086% |
| <b>45</b> | 0.287% | 0.196% | 0.173% | 0.096% |
| <b>46</b> | 0.317% | 0.217% | 0.192% | 0.107% |
| <b>47</b> | 0.351% | 0.241% | 0.214% | 0.119% |
| <b>48</b> | 0.389% | 0.266% | 0.238% | 0.132% |
| <b>49</b> | 0.431% | 0.295% | 0.264% | 0.147% |
| <b>50</b> | 0.477% | 0.327% | 0.294% | 0.163% |
| <b>51</b> | 0.528% | 0.361% | 0.327% | 0.181% |
| <b>52</b> | 0.584% | 0.400% | 0.363% | 0.202% |
| <b>53</b> | 0.647% | 0.443% | 0.404% | 0.224% |
| <b>54</b> | 0.716% | 0.490% | 0.449% | 0.249% |
| <b>55</b> | 0.793% | 0.543% | 0.499% | 0.277% |

### Supplementary Material References

1. Global burden of disease study 2017: population estimates. Institute for Health Metrics and Evaluation (IHME). 2018. Available from: <http://ghdx.healthdata.org/record/ihme-data/gbd-2017-population-estimates-1950-2017>.
2. Global burden of disease study 2017 (GBD 2017) results. Institute for Health Metrics and Evaluation (IHME). 2017. Available from: <http://vizhub.healthdata.org/gbd-compare/>.
3. National Institute for Health Research & Development. Riset Kesehatan Dasar (National Health Survey). Ministry of Health Republic of Indonesia. 2018.
4. Norgaard ML, Andersen SS, Schramm TK, Folke F, Jorgensen CH, Hansen ML, Andersson C, Bretler DM, Vaag A, Kober L, et al. Changes in short- and long-term cardiovascular risk of incident diabetes and incident myocardial infarction—a nationwide study. *Diabetologia*. 2010;53(8):1612–9.
